# Supplementary material for: Genetic and metabolomic architecture of variation in diet restriction-mediated lifespan extension in Drosophila
Source: PLOS journal article supplement (doi:10.1371/journal.pgen.1008835), 2020-07-09
Supplement: S3 (10.1371/journal.pgen.1008835.s003) [file journal.pgen.1008835.s003]

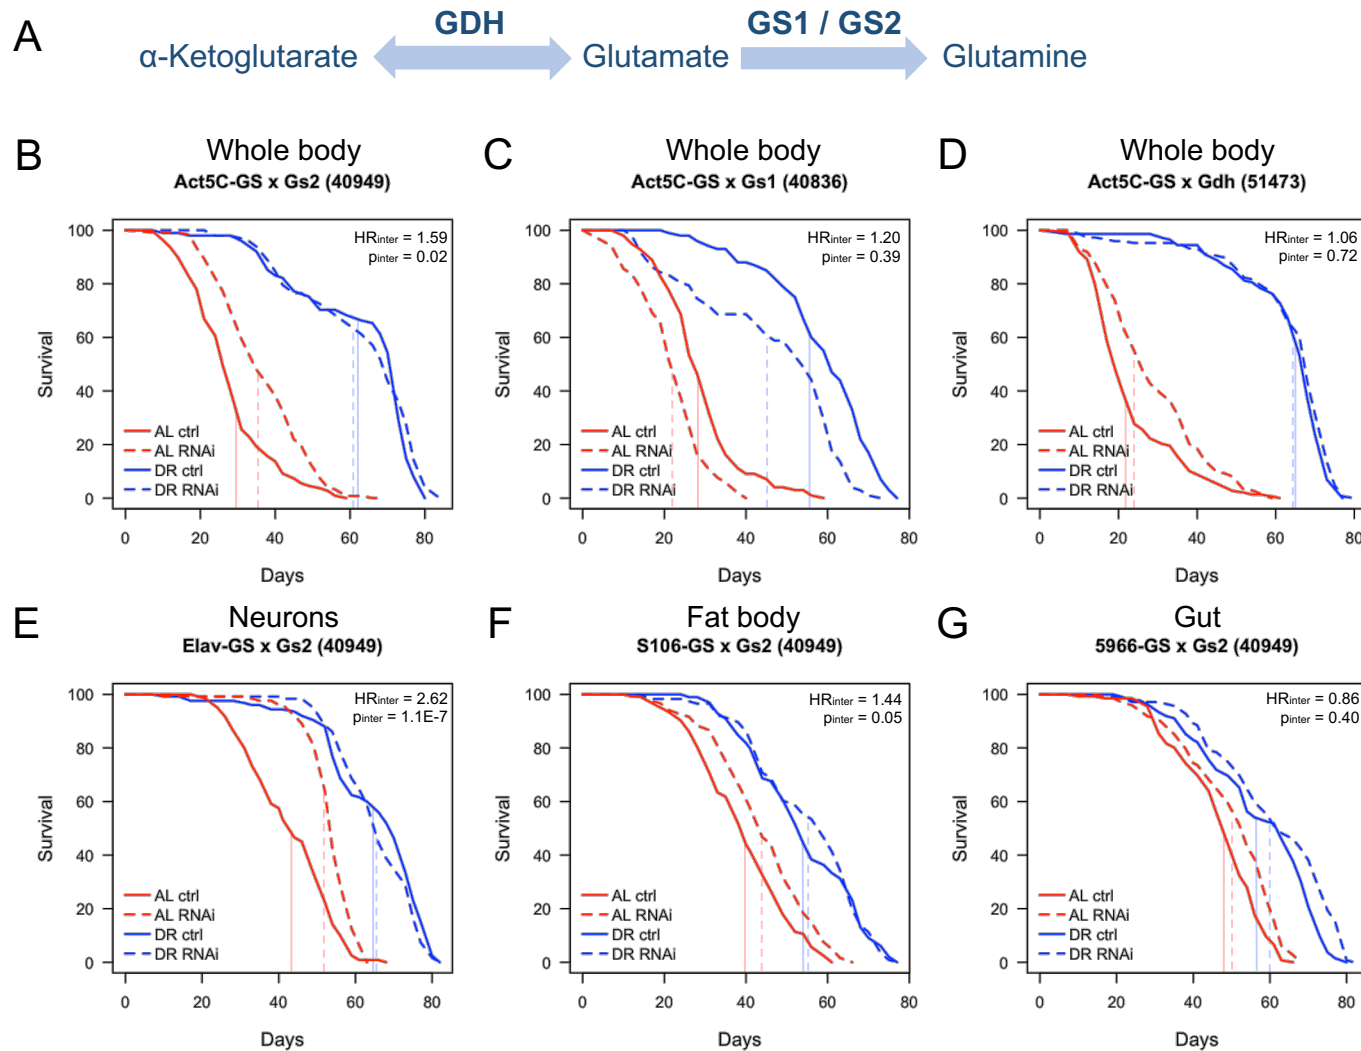

**S3 Fig. Diet-dependent survival of GDH, GS1, and GS2 RNAi flies.** (A) The  $\alpha$ -KG/glutamine pathway was manipulated by inhibiting transcript levels of *gs1/2* and *gdh*. (B-G) Survival of RNAi (+RU486) versus control (-RU486) flies of GS2, GS1, and GDH RNAi in whole-body (*act5c-gal4-gs* driver; B-D), GS2 RNAi in brain (*elav-gal4-gs* driver; E), GS2 RNAi in fat body (*S106-gal4-gs*; F), and GS2 RNAi in gut (*5966-gal4-gs*; G) on AL and DR. Vertical lines indicate mean survival. Statistical model is a Cox Proportional Hazards model fitting survival as a function of diet, RNAi, and the interaction between diet and RNAi. Hazard ratios (HR) and p-values are specific to the interaction term.
